# Supplementary material for: Characterizing the Prevalence of Obesity Misinformation, Factual Content, Stigma, and Positivity on the Social Media Platform Reddit Between 2011 and 2019: Infodemiology Study
Source: J Med Internet Res. 2022 Dec 30;24(12):e36729. doi: 10.2196/36729 (PMC9840103; doi:10.2196/36729)
Supplement: Multimedia Appendix 2 [file jmir_v24i12e36729_app2.docx]

**Multimedia Appendix 2: Keyword Refinement Process**

**Confusion matrix for keyword refinement.**

|  | Related to Obesity | Not Related to Obesity | Total |
| --- | --- | --- | --- |
| Would Have Been Captured by Keywords | 7a | 8b | 15 |
| Would Not Have Been Captured By Keywords | 7c | 978d | 985 |
| Total | 14 | 986 | 1000 |

a. Example of a sentence **related to obesity** that **includes a keyword** (**true positive**): “Remember that you didn’t get to this *weight* overnight.”

b. Example a sentence **not related to obesity** that **includes a keyword** (**false positive**): “I can tell you that on many light *weight* carbon frames you can actually deflect the top and down tubes just by squeezing them with thumb and index finger.”

c. Example of a sentence **related to obesity** that **does not include a keyword** (**false negative**): “Well you’re certainly a big boy, a large canvas so to speak.”

d. Example of a sentence **not related to obesity** that **does not include a keyword** (**true negative**): “I put it through google translate really quick.”

**Summary metrics before keyword refinement:**

**Accuracy:**

**Precision/Positive Predictive Value:**

**Negative Predictive Value:**

**Recall/Sensitivity:**

**Specificity:**

**F1-Score:**

**Confusion matrix for keyword refinement**

After the above analysis, keywords were restricted to just those sentences that mentioned “obese” or “obesity”

|  | Related to Obesity | Not Related to Obesity | Total |
| --- | --- | --- | --- |
| Would Have Been Captured by Keywords | 0 | 0 | 0 |
| Would Not Have Been Captured By Keywords | 14 | 986 | 1000 |
| Total | 14 | 986 | 1000 |

**Summary metrics after keyword refinement:**

**Accuracy:**

**Precision/Positive Predictive Value:**

**Negative Predictive Value:**

**Recall/Sensitivity:**

**Specificity:**

**F1-Score:**
